# Supplementary material for: Heart Failure and Patient‐Reported Outcomes in Adults With Congenital Heart Disease from 15 Countries
Source: PubMed Central journal article supplement — J Am Heart Assoc. 2022 Apr 26;11(9):e024993. doi: 10.1161/JAHA.121.024993 (PMC9238599; doi:10.1161/jaha.121.024993), 2022-04-26
Supplement: JAH3-11-e024993-s001.pdf [file JAH3-11-e024993-s001.pdf]

# **SUPPLEMENTAL MATERIAL**

**Table S1. Summary of patient-reported outcomes.**

| Variables                      | Measurements                                                               | Description                                                                                                                                                                                                                                                        | Scale   | Interpretation                                 |
|--------------------------------|----------------------------------------------------------------------------|--------------------------------------------------------------------------------------------------------------------------------------------------------------------------------------------------------------------------------------------------------------------|---------|------------------------------------------------|
| Patient-reported health status | 12-item Short-form Health Survey version 2 (SF-12) <sup>31</sup>           | <ul style="list-style-type: none"> <li>8 health domains</li> <li>divided into physical (PCS) and mental (MCS) component scores</li> </ul>                                                                                                                          |         |                                                |
|                                |                                                                            | Physical Component Summary (PCS): <ul style="list-style-type: none"> <li>Physical functioning</li> <li>Role participation with physical health problems</li> <li>Bodily pain</li> <li>General health</li> </ul>                                                    | 0-100   | Higher score = better perceived health status  |
|                                |                                                                            | Mental Component Summary (MCS): <ul style="list-style-type: none"> <li>Vitality</li> <li>Social functioning</li> <li>Emotional health</li> <li>Mental health</li> </ul>                                                                                            | 0-100   | Higher score = better perceived health status. |
| Quality of life                | Linear Analogue Scale (LAS) <sup>32</sup>                                  | The degree of overall life satisfaction that is positively or negatively influenced by individuals' perception of certain aspects of life important to them, including matters both related and unrelated to health. <sup>33</sup>                                 | 0-100   | Higher score = better quality of life          |
|                                | Satisfaction With Life Scale (SWLS) <sup>34</sup>                          | 5 statements with scores from 1 to 7                                                                                                                                                                                                                               | 5 - 35  | Higher score = better satisfaction of life     |
| Sense of coherence             | Sense of Coherence Score – Orientation to Life Questionnaire <sup>35</sup> | 3 components: <ul style="list-style-type: none"> <li>Comprehensibility</li> <li>Manageability</li> <li>Meaningfulness</li> </ul>                                                                                                                                   | 13 - 91 | Higher score = higher sense of coherence       |
| Psychological distress         | Hospital Anxiety and Depression Scale <sup>36</sup>                        | Hospital Anxiety Scale (HADS-A)                                                                                                                                                                                                                                    | 0 - 21  | Higher score = greater psychological distress  |
|                                |                                                                            | Hospital Depression Scale (HADS-D)                                                                                                                                                                                                                                 | 0 - 21  | Higher score = greater psychological distress  |
| Illness perception             | Brief Illness Perception Questionnaire (Brief IPQ) <sup>37</sup>           | 9 items: <ol style="list-style-type: none"> <li>Consequences;</li> <li>Timeline;</li> <li>Personal control;</li> <li>Treatment control;</li> <li>Identity;</li> <li>Coherence;</li> <li>Concern;</li> <li>Emotional response;</li> <li>Perceived causes</li> </ol> | 0-80    | Higher score = worse illness perception        |
